# Supplementary material for: Sigma bond metathesis with pentamethylcyclopentadienyl ligands in sterically crowded (C5Me5)3M complexes
Source: Royal Society of Chemistry journal article supplement (doi:10.1039/c002654a), 2010-01-01
Supplement: c002654a.pdf [file c002654a.pdf]

**Sigma Bond Metathesis with Pentamethylcyclopentadienyl Ligands in Sterically  
Crowded (C<sub>5</sub>Me<sub>5</sub>)<sub>3</sub>M Complexes**

Thomas J. Mueller, Joseph W. Ziller, and William J. Evans\*

Department of Chemistry, University of California  
Irvine, California 92697-2025 (U.S.A.)  
Fax: 949-824-2210  
E-mail: [wevans@uci.edu](mailto:wevans@uci.edu)

### X-ray Data Collection, Structure Solution and Refinement for $[(C_5Me_5)_2La(SePh)]_2$ , **1b**.

A colorless crystal of approximate dimensions 0.22 x 0.24 x 0.26 mm was mounted on a glass fiber and transferred to a Bruker SMART1K diffractometer. The SMART<sup>1</sup> program package was used to determine the unit-cell parameters and for data collection (25 sec/frame scan time for a sphere of diffraction data). The raw frame data was processed using SAINT<sup>2</sup> and SADABS<sup>3</sup> to yield the reflection data file. Subsequent calculations were carried out using the SHELXTL<sup>4</sup> program. The diffraction symmetry was *mmm* and the systematic absences were consistent with the orthorhombic space groups *Pnn2* and *Pnmm*. It was later determined that the noncentrosymmetric space group *Pnn2* was correct.

The structure was solved using the coordinates of the cerium sulfur analogue and refined on  $F^2$  by full-matrix least-squares techniques. The analytical scattering factors<sup>5</sup> for neutral atoms were used throughout the analysis. Hydrogen atoms were included using a riding model. The molecule is located on a two-fold rotation axis.

At convergence,  $wR2 = 0.0460$  and  $Goof = 1.057$  for 265 variables refined against 6015 data ( $0.75\text{\AA}$ ),  $R1 = 0.0187$  for those 5560 data with  $I > 2.0\sigma(I)$ . The structure was refined as a twin with the Flack<sup>6</sup> parameter/BASF = 0.232(9).

---

<sup>1</sup> SMART Software Users Guide, Version 5.1, Bruker Analytical X-Ray Systems, Inc.; Madison, WI 1999.

<sup>2</sup> SAINT Version 6.36a, Bruker Analytical X-Ray Systems, Inc.; Madison, WI 1999.

<sup>3</sup> Sheldrick, G. M. SADABS, Version 2008/1, Bruker Analytical X-Ray Systems, Inc.; Madison, WI 2008.

<sup>4</sup> Sheldrick, G. M. SHELXTL Version 6.12, Bruker Analytical X-Ray Systems, Inc.; Madison, WI 2001.

<sup>5</sup> International Tables for X-Ray Crystallography 1992, Vol. C., Dordrecht: Kluwer Academic Publishers.

<sup>6</sup> H. D. Flack, *Acta. Cryst.*, 1983, **A39**, 876.

Table 1. Crystal data and structure refinement for **1b**.

|                                         |                                                                 |          |
|-----------------------------------------|-----------------------------------------------------------------|----------|
| Identification code                     | tjm4 ( <b>1b</b> )                                              |          |
| Empirical formula                       | C <sub>52</sub> H <sub>70</sub> La <sub>2</sub> Se <sub>2</sub> |          |
| Formula weight                          | 1130.82                                                         |          |
| Temperature                             | 153(2) K                                                        |          |
| Wavelength                              | 0.71073 Å                                                       |          |
| Crystal system                          | Orthorhombic                                                    |          |
| Space group                             | <i>Pnn2</i>                                                     |          |
| Unit cell dimensions                    | a = 10.3729(10) Å                                               | α = 90°. |
|                                         | b = 12.0187(12) Å                                               | β = 90°. |
|                                         | c = 19.4835(19) Å                                               | γ = 90°. |
| Volume                                  | 2429.0(4) Å <sup>3</sup>                                        |          |
| Z                                       | 2                                                               |          |
| Density (calculated)                    | 1.546 Mg/m <sup>3</sup>                                         |          |
| Absorption coefficient                  | 3.266 mm <sup>-1</sup>                                          |          |
| F(000)                                  | 1128                                                            |          |
| Crystal color                           | colorless                                                       |          |
| Crystal size                            | 0.26 x 0.24 x 0.22 mm <sup>3</sup>                              |          |
| Theta range for data collection         | 1.99 to 28.30°                                                  |          |
| Index ranges                            | -13 ≤ h ≤ 13, -15 ≤ k ≤ 16, -25 ≤ l ≤ 25                        |          |
| Reflections collected                   | 25662                                                           |          |
| Independent reflections                 | 6015 [R(int) = 0.0258]                                          |          |
| Completeness to theta = 28.30°          | 100.0 %                                                         |          |
| Absorption correction                   | Semi-empirical from equivalents                                 |          |
| Max. and min. transmission              | 0.5336 and 0.4839                                               |          |
| Refinement method                       | Full-matrix least-squares on F <sup>2</sup>                     |          |
| Data / restraints / parameters          | 6015 / 1 / 265                                                  |          |
| Goodness-of-fit on F <sup>2</sup>       | 1.057                                                           |          |
| Final R indices [I > 2σ(I) = 5560 data] | R1 = 0.0187, wR2 = 0.0445                                       |          |
| R indices (all data, 0.75 Å)            | R1 = 0.0221, wR2 = 0.0460                                       |          |
| Absolute structure parameter            | 0.232(9)                                                        |          |
| Largest diff. peak and hole             | 0.487 and -0.599 e.Å <sup>-3</sup>                              |          |

---

Symmetry transformations used to generate equivalent atoms:

#1 -x+1,-y+1,z

X-ray Data Collection, Structure Solution and Refinement for  $[(C_5Me_5)_2La(SePh)(NCCMe_3)]_2$ , **2b**.

A colorless crystal of approximate dimensions 0.09 x 0.19 x 0.34 mm was mounted on a glass fiber and transferred to a Bruker SMART APEX II diffractometer. The APEX2<sup>7</sup> program package was used to determine the unit-cell parameters and for data collection (25 sec/frame scan time for a sphere of diffraction data). The raw frame data was processed using SAINT<sup>8</sup> and SADABS<sup>9</sup> to yield the reflection data file. Subsequent calculations were carried out using the SHELXTL<sup>4</sup> program. There were no systematic absences nor any diffraction symmetry other than the Friedel condition. The centrosymmetric triclinic space group  $P\bar{1}$  was assigned and later determined to be correct.

The structure was solved by direct methods and refined on  $F^2$  by full-matrix least-squares techniques. The analytical scattering factors<sup>5</sup> for neutral atoms were used throughout the analysis. Hydrogen atoms were included using a riding model. The molecules were dimers and were located about inversion centers. There were 3.5 molecules of benzene solvent present per dimeric formula-unit. At convergence,  $wR2 = 0.0583$  and  $Goof = 1.023$  for 828 variables refined against 17502 data (0.74Å),  $R1 = 0.0237$  for those 15175 data with  $I > 2.0\sigma(I)$ .

---

<sup>7</sup> APEX2 Version 2.2-0 Bruker AXS, Inc.; Madison, WI 2007.

<sup>8</sup> SAINT Version 7.46a, Bruker AXS, Inc.; Madison, WI 2007

<sup>9</sup> Sheldrick, G. M. SADABS, Version 2007/4, Bruker AXS, Inc.; Madison, WI 2007

Table 2. Crystal data and structure refinement for **2b**.

|                                                           |                                                                                                                      |                         |
|-----------------------------------------------------------|----------------------------------------------------------------------------------------------------------------------|-------------------------|
| Identification code                                       | tjm30 ( <b>2b</b> )                                                                                                  |                         |
| Empirical formula                                         | C <sub>62</sub> H <sub>88</sub> La <sub>2</sub> N <sub>2</sub> Se <sub>2</sub> • 3.5(C <sub>6</sub> H <sub>6</sub> ) |                         |
| Formula weight                                            | 1570.46                                                                                                              |                         |
| Temperature                                               | 153(2) K                                                                                                             |                         |
| Wavelength                                                | 0.71073 Å                                                                                                            |                         |
| Crystal system                                            | Triclinic                                                                                                            |                         |
| Space group                                               | <i>P</i> $\bar{1}$                                                                                                   |                         |
| Unit cell dimensions                                      | <i>a</i> = 14.9927(9) Å                                                                                              | $\alpha$ = 88.5675(7)°. |
|                                                           | <i>b</i> = 15.3140(9) Å                                                                                              | $\beta$ = 88.8528(7)°.  |
|                                                           | <i>c</i> = 16.9117(10) Å                                                                                             | $\gamma$ = 79.9654(7)°. |
| Volume                                                    | 3821.8(4) Å <sup>3</sup>                                                                                             |                         |
| <i>Z</i>                                                  | 2                                                                                                                    |                         |
| Density (calculated)                                      | 1.365 Mg/m <sup>3</sup>                                                                                              |                         |
| Absorption coefficient                                    | 2.098 mm <sup>-1</sup>                                                                                               |                         |
| <i>F</i> (000)                                            | 1606                                                                                                                 |                         |
| Crystal color                                             | colorless                                                                                                            |                         |
| Crystal size                                              | 0.34 x 0.19 x 0.09 mm <sup>3</sup>                                                                                   |                         |
| Theta range for data collection                           | 1.75 to 28.50°                                                                                                       |                         |
| Index ranges                                              | -20 ≤ <i>h</i> ≤ 19, -20 ≤ <i>k</i> ≤ 20, -22 ≤ <i>l</i> ≤ 22                                                        |                         |
| Reflections collected                                     | 44479                                                                                                                |                         |
| Independent reflections                                   | 17502 [R(int) = 0.0210]                                                                                              |                         |
| Completeness to theta = 28.50°                            | 90.4 %                                                                                                               |                         |
| Absorption correction                                     | Semi-empirical from equivalents                                                                                      |                         |
| Max. and min. transmission                                | 0.8337 and 0.5357                                                                                                    |                         |
| Refinement method                                         | Full-matrix least-squares on <i>F</i> <sup>2</sup>                                                                   |                         |
| Data / restraints / parameters                            | 17502 / 0 / 828                                                                                                      |                         |
| Goodness-of-fit on <i>F</i> <sup>2</sup>                  | 1.023                                                                                                                |                         |
| Final R indices [ <i>I</i> > 2σ( <i>I</i> ) = 15175 data] | R1 = 0.0237, wR2 = 0.0558                                                                                            |                         |
| R indices (all data)                                      | R1 = 0.0305, wR2 = 0.0583                                                                                            |                         |
| Largest diff. peak and hole                               | 0.853 and -0.464 e.Å <sup>-3</sup>                                                                                   |                         |

---

Symmetry transformations used to generate equivalent atoms:

#1 -x+1,-y,-z+1 #2 -x+2,-y+1,-z #3 -x+1,-y+1,-z+1

X-ray Data Collection, Structure Solution and Refinement for  $[(C_5Me_5)_2Ce(SPh)]_2$ , **3**,  
Figure S1.

A purple crystal of approximate dimensions 0.19 x 0.21 x 0.32 mm was mounted on a glass fiber and transferred to a Bruker SMART APEX II diffractometer. The APEX2<sup>10</sup> program package was used to determine the unit-cell parameters and for data collection (20 sec/frame scan time for a sphere of diffraction data). The raw frame data was processed using SAINT<sup>11</sup> and SADABS<sup>3</sup> to yield the reflection data file. Subsequent calculations were carried out using the SHELXTL<sup>4</sup> program. The diffraction symmetry was *mmm* and the systematic absences were consistent with the orthorhombic space groups *Pnn2* and *Pnmm*. It was later determined that the noncentrosymmetric space group *Pnn2* was correct.

The structure was solved by direct methods and refined on  $F^2$  by full-matrix least-squares techniques. The analytical scattering factors<sup>5</sup> for neutral atoms were used throughout the analysis. Hydrogen atoms were included using a riding model. The molecule was located on a two-fold rotation axis.

At convergence,  $wR2 = 0.0584$  and  $Goof = 1.046$  for 264 variables refined against 5782 data ( $0.75\text{\AA}$ ),  $R1 = 0.0207$  for those 5498 data with  $I > 2.0\sigma(I)$ . The absolute structure was assigned by refinement of the Flack parameter.<sup>6</sup>

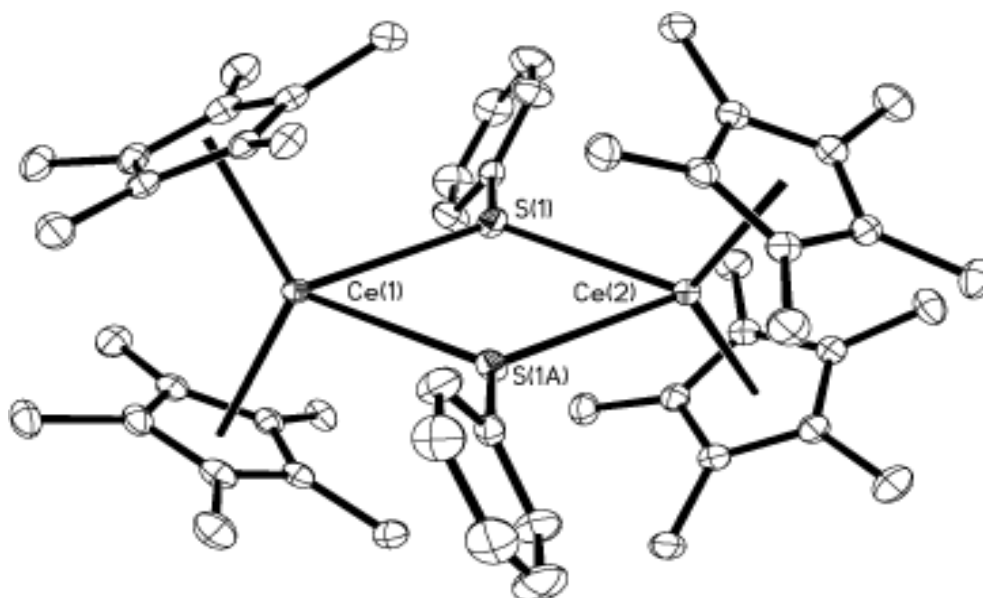

**Figure S1.** Thermal ellipsoid plot of  $[(C_5Me_5)_2Ce(SPh)]_2$ , **3**, drawn at the 50% probability level. Hydrogen atoms have been omitted for clarity.

<sup>10</sup> APEX2 Version 2008.3-0, Bruker AXS, Inc.; Madison, WI 200/8.

<sup>11</sup> SAINT Version 7.53a, Bruker AXS, Inc.; Madison, WI 2007.

Table 3. Crystal data and structure refinement for **3**.

|                                         |                                                                |          |
|-----------------------------------------|----------------------------------------------------------------|----------|
| Identification code                     | tjm29 ( <b>3</b> )                                             |          |
| Empirical formula                       | C <sub>52</sub> H <sub>70</sub> Ce <sub>2</sub> S <sub>2</sub> |          |
| Formula weight                          | 1039.44                                                        |          |
| Temperature                             | 103(2) K                                                       |          |
| Wavelength                              | 0.71073 Å                                                      |          |
| Crystal system                          | Orthorhombic                                                   |          |
| Space group                             | <i>Pnn2</i>                                                    |          |
| Unit cell dimensions                    | a = 10.3287(7) Å                                               | α = 90°. |
|                                         | b = 11.7979(8) Å                                               | β = 90°. |
|                                         | c = 19.4736(13) Å                                              | γ = 90°. |
| Volume                                  | 2373.0(3) Å <sup>3</sup>                                       |          |
| Z                                       | 2                                                              |          |
| Density (calculated)                    | 1.455 Mg/m <sup>3</sup>                                        |          |
| Absorption coefficient                  | 2.015 mm <sup>-1</sup>                                         |          |
| F(000)                                  | 1060                                                           |          |
| Crystal color                           | purple                                                         |          |
| Crystal size                            | 0.32 x 0.21 x 0.19 mm <sup>3</sup>                             |          |
| Theta range for data collection         | 2.02 to 28.28°                                                 |          |
| Index ranges                            | -13 ≤ h ≤ 13, -15 ≤ k ≤ 15, -25 ≤ l ≤ 25                       |          |
| Reflections collected                   | 26891                                                          |          |
| Independent reflections                 | 5782 [R(int) = 0.0247]                                         |          |
| Completeness to theta = 28.28°          | 99.5 %                                                         |          |
| Absorption correction                   | Semi-empirical from equivalents                                |          |
| Max. and min. transmission              | 0.7008 and 0.5649                                              |          |
| Refinement method                       | Full-matrix least-squares on F <sup>2</sup>                    |          |
| Data / restraints / parameters          | 5782 / 1 / 264                                                 |          |
| Goodness-of-fit on F <sup>2</sup>       | 1.046                                                          |          |
| Final R indices [I > 2σ(I) = 5498 data] | R1 = 0.0207, wR2 = 0.0571                                      |          |
| R indices (all data, 0.75 Å)            | R1 = 0.0218, wR2 = 0.0584                                      |          |
| Absolute structure parameter            | 0.001(14)                                                      |          |
| Largest diff. peak and hole             | 1.152 and -0.276 e.Å <sup>-3</sup>                             |          |

---

Symmetry transformations used to generate equivalent atoms:

#1 -x+1,-y+1,z

X-ray Data Collection, Structure Solution and Refinement for  $[(C_5Me_5)_2Pr(SPh)]_2$ , **5**, Figure S2.

A yellow crystal of approximate dimensions 0.13 x 0.15 x 0.18 mm was mounted on a glass fiber and transferred to a Bruker SMART APEX II diffractometer. The APEX2<sup>7</sup> program package was used to determine the unit-cell parameters and for data collection (10 sec/frame scan time for a sphere of diffraction data). The raw frame data was processed using SAINT<sup>8</sup> and SADABS<sup>3</sup> to yield the reflection data file. Subsequent calculations were carried out using the SHELXTL<sup>12</sup> program. The diffraction symmetry was *mmm* and the systematic absences were consistent with the orthorhombic space groups *Pnn2* and *Pnnm*. It was later determined that the noncentrosymmetric space group *Pnn2* was correct.

The structure was solved using the coordinates of the analogous cerium complex and refined on  $F^2$  by full-matrix least-squares techniques. The analytical scattering factors<sup>5</sup> for neutral atoms were used throughout the analysis. Hydrogen atoms were included using a riding model. The molecule was located on a two-fold rotation axis.

At convergence,  $wR2 = 0.0930$  and  $Goof = 1.028$  for 264 variables refined against 5403 data ( $0.77\text{\AA}$ ),  $R1 = 0.0334$  for those 4399 data with  $I > 2.0\sigma(I)$ . The absolute structure was assigned by refinement of the Flack parameter.<sup>6</sup>

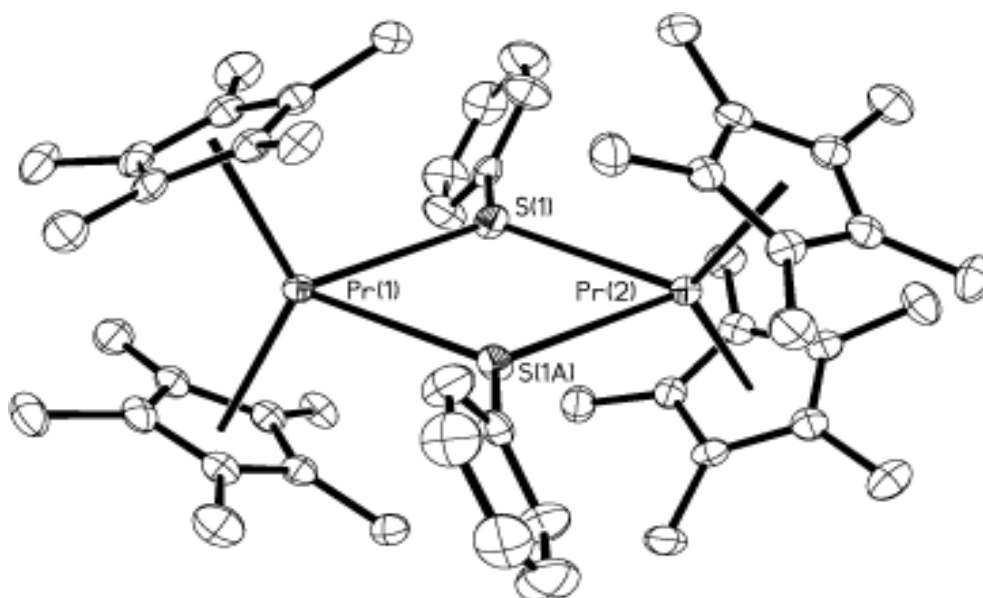

**Figure S2.** Thermal ellipsoid plot of  $[(C_5Me_5)_2Pr(SPh)]_2$ , **5**, drawn at the 50% probability level. Hydrogen atoms have been omitted for clarity.

<sup>12</sup> Sheldrick, G. M. SHELXTL, Version 2008/3, Bruker AXS, Inc.; Madison, WI 2008.



Table 4. Crystal data and structure refinement for  $[(C_5Me_5)_2Pr(SPh)]_2$ , **5**.

|                                                 |                                                              |                       |
|-------------------------------------------------|--------------------------------------------------------------|-----------------------|
| Identification code                             | tjm35 ( <b>5</b> )                                           |                       |
| Empirical formula                               | $C_{52} H_{70} Pr_2 S_2$                                     |                       |
| Formula weight                                  | 1041.02                                                      |                       |
| Temperature                                     | 148(2) K                                                     |                       |
| Wavelength                                      | 0.71073 Å                                                    |                       |
| Crystal system                                  | Orthorhombic                                                 |                       |
| Space group                                     | $Pnn2$                                                       |                       |
| Unit cell dimensions                            | $a = 10.3504(6)$ Å                                           | $\alpha = 90^\circ$ . |
|                                                 | $b = 11.7647(7)$ Å                                           | $\beta = 90^\circ$ .  |
|                                                 | $c = 19.4542(12)$ Å                                          | $\gamma = 90^\circ$ . |
| Volume                                          | $2368.9(2)$ Å <sup>3</sup>                                   |                       |
| Z                                               | 2                                                            |                       |
| Density (calculated)                            | 1.459 Mg/m <sup>3</sup>                                      |                       |
| Absorption coefficient                          | 2.153 mm <sup>-1</sup>                                       |                       |
| F(000)                                          | 1064                                                         |                       |
| Crystal color                                   | yellow                                                       |                       |
| Crystal size                                    | 0.18 x 0.15 x 0.13 mm <sup>3</sup>                           |                       |
| Theta range for data collection                 | 2.02 to 27.48°                                               |                       |
| Index ranges                                    | $-13 \leq h \leq 13, -15 \leq k \leq 15, -25 \leq l \leq 25$ |                       |
| Reflections collected                           | 25686                                                        |                       |
| Independent reflections                         | 5403 [R(int) = 0.0477]                                       |                       |
| Completeness to theta = 27.48°                  | 99.8 %                                                       |                       |
| Absorption correction                           | Semi-empirical from equivalents                              |                       |
| Max. and min. transmission                      | 0.7671 and 0.6979                                            |                       |
| Refinement method                               | Full-matrix least-squares on F <sup>2</sup>                  |                       |
| Data / restraints / parameters                  | 5403 / 1 / 264                                               |                       |
| Goodness-of-fit on F <sup>2</sup>               | 1.028                                                        |                       |
| Final R indices [ $I > 2\sigma(I)$ = 4399 data] | R1 = 0.0334, wR2 = 0.0859                                    |                       |
| R indices (all data, 0.77Å)                     | R1 = 0.0434, wR2 = 0.0930                                    |                       |
| Absolute structure parameter                    | -0.01(3)                                                     |                       |
| Largest diff. peak and hole                     | 2.663 and -0.492 e.Å <sup>-3</sup>                           |                       |

---

Symmetry transformations used to generate equivalent atoms:

#1 -x+1,-y+1,z
